# Supplementary material
Source: publisher figshare collection journal article supplement (https://geolsoc.figshare.com/ndownloader/files/25672642)
Supplement: Supplementary file 1 [file 25672642]

|  | Sample | Source | 206Pb/204Pb | 207Pb/204Pb | 208Pb/204Pb | 87Sr/86Sr | 143Nd/144Nd | ԐNd |
| --- | --- | --- | --- | --- | --- | --- | --- | --- |
| Miocene basalts | P9LT19 | Li (2013) | 17.85 | 15.52 | 37.92 | 0.704627 | 0.512799 | 3.1 |
| P6Tc14-1 | 17.95 | 15.49 | 37.13 | 0.704278 | 0.512734 | 1.9 |
| P4LT1a | 17.85 | 15.46 | 37.15 | 0.704967 | 0.512671 | 0.6 |
| JB-24 | Yan & Zhao (2008) | 17.54 | 15.46 | 37.82 | 0.704429 | 0.512745 | 2.1 |
| JB-25 | 17.81 | 15.46 | 37.71 | 0.704100 | 0.512944 | 6.0 |
| JB-26 | 17.85 | 15.48 | 37.82 | 0.703983 | 0.512926 | 5.6 |
| JB-27 | 17.85 | 15.48 | 37.82 | 0.704018 | 0.512927 | 5.6 |
| Pleistocene basalts | P3LT88h | Li (2013) | 17.80 | 15.47 | 37.79 | 0.704530 | 0.512743 | 2.0 |
| P2LT8-1d | 18.02 | 15.49 | 37.91 | 0.704768 | 0.512731 | 1.8 |
| P3LT88b | 17.99 | 15.50 | 37.95 | 0.704287 | 0.512713 | 1.5 |
| JB-1 | Yan & Zhao (2008) | 17.93 | 15.54 | 38.07 | 0.704296 | 0.512804 | 3.2 |
| JB-2 | 17.94 | 15.53 | 38.03 | 0.704583 | 0.512771 | 2.6 |
| Holocene alkali olivine basalts | P1LT60 | Li (2013) | 17.74 | 15.49 | 37.97 | 0.704578 | 0.512704 | 1.3 |
| JB-5 | Yan & Zhao (2008) | 17.88 | 15.54 | 38.04 | 0.704041 | 0.512832 | 3.8 |
| JB-7 | 18.15 | 15.54 | 37.93 | 0.703947 | 0.512849 | 4.1 |
| JB-8 | 17.63 | 15.51 | 37.85 | 0.703932 | 0.512843 | 4.0 |
| JB-9 | 17.67 | 15.53 | 37.95 | 0.703915 | 0.512825 | 3.7 |
| JB-11 | 17.59 | 15.50 | 37.93 | 0.704417 | 0.512715 | 1.5 |
| JB-12 | 17.58 | 15.49 | 37.91 | 0.704430 | 0.512734 | 1.9 |
| JB-14 | 17.55 | 15.48 | 37.88 | 0.704402 | 0.512731 | 1.8 |
| JB-15 | 17.58 | 15.51 | 37.96 | 0.704426 | 0.512735 | 1.9 |
| JB-16A | 17.57 | 15.51 | 37.95 | 0.704429 | 0.512737 | 1.9 |
| JB-16B | 17.56 | 15.49 | 37.91 | 0.704415 | 0.512714 | 1.5 |
| JB-17 | 17.55 | 15.48 | 37.86 | 0.704420 | 0.512736 | 1.9 |
| JB-18 | 17.55 | 15.47 | 37.82 | 0.704427 | 0.512733 | 1.9 |
| JB-19 | 17.56 | 15.48 | 37.86 | 0.704556 | 0.512726 | 1.7 |
| JB-20 | 17.56 | 15.49 | 37.91 | 0.704414 | 0.512732 | 1.8 |
| JB-21 | 17.55 | 15.48 | 37.86 | 0.704457 | 0.512704 | 1.3 |
| JB-22 | 17.57 | 15.48 | 37.87 | 0.704456 | 0.512722 | 1.6 |
| JB-23 | 17.54 | 15.45 | 37.79 | 0.704423 | 0.512732 | 1.8 |
| J99821-5 | Zou et al (2008) | 18.00 | 15.51 | 37.96 | 0.704114 | 0.512801 | 3.2 |
| Holocene Leucite tephrites | J99822-1 | Zou et al (2008) | 17.88 | 15.51 | 38.04 | 0.704409 | 0.512713 | 1.5 |
